# Supplementary material for: Fold Recognition of the Human Immunodeficiency Virus Type 1 V3 Loop and Flexibility of Its Crown Structure During the Course of Adaptation to a Host
Source: Oxford University Press journal article supplement (doi:10.1534/genetics.105.051508), 2005-12-19
Supplement: 51508_watabe.doc [file 51508_watabe.doc]

SUPPLEMENTAL DATA

**Expansion formula for the conditional probability of sequence:** Denoting an amino acid sequence and the positions of the C atoms of amino acid residues by and respectively, we express the conditional probability of a sequence given the structural environment as a product of ordered terms representing interaction among residues:

. [A]

The dots on the right hand side of the equation are for the higher order terms. The expression , for instance, means that the indices *I* and *J* are for all combination of two indices among *i*, *j* and *k*. When the sequence consists of *n* residues, there should be *n* terms on the right hand side of Eq.A. It should be noted that Eq.A is not an approximated equation but exact. For instance, when *n* is 2 (the sequence consists of two residues), the right hand side of Eq.A contains until second order term and the first order term cancels out the denominator of the second order term. On the same way, exactness of Eq.A with *n*>2 could be shown with use of the expression for *m*-th order term given by the following formula:

.

The first order term on the right hand side of Eq.A represents an amino acid preference of the structural environment like residue burial. The second order term is for the pairwise interaction between amino acid residues. The higher order terms express the effects of many-body interactions among amino acid residues. It should be noted that if there is no many-body interaction among residues, the numerator and denominator of each of second and higher order terms cancel with each other and the first order term is the only term contributing to the conditional probability of the sequence.

Keeping all order of terms in Eq.A, it is obviously hard to carry out the evaluation of the conditional probability. Furthermore, it is unlikely that many-body interactions with residue numbers more than two make significant contribution to the probability, because most of known interactions are pairwise interactions (for instance ionic interaction) and significant correlation among residues result from direct bonds between residues (like hydrogen bond and disulfide bond). An exception might be the hydrophobic interaction. However the hydrophobic interaction is an unsubstantial interaction which is not based on any physical mechanics, but is a consequence of several physical chemistry effects. Hence it is unlikely to expect a significant contribution of higher order terms due to the hydrophobic interaction. Therefore, we neglect the higher order terms with residue numbers more than two and replace Eq.A with an approximated equation:

. [B]

Introducing information about amino acid preference of the local environments and pairwise interactions, we evaluate the conditional probability (Eq.B). We decompose the structural information **X** into residue burials and spatial distances between pairs of residues and rewrote Eq.B:

. [C]

Here, is the local environment of the *i*th amino acid residue and is defined by the category of residue burial. is the spatial distance between the C atoms at the residues *i* and *j*. The environment class and the spatial distance are categorized as explained in the main text.

Using the categorization defined in the main text, we obtain the conditional distributions on the right hand side of Eq.C empirically from the non-redundant set of protein structures in Protein Data Bank (PDB) (Hobohm and Sander 1994: the latest library is available from Web site as explained in the main text). We show some examples of the calculated conditional distributions. Figure A shows two examples of : the amino acid frequencies in the environment class of the lightest category (blue line) and those in the heaviest category (brown line).

| Figure A: Two examples of . One (blue line) is with the environment class of category “0-4” and the other (brown line) is of category “more than 28”. |
| --- |

In case of the heaviest category, the C atom of the corresponding residue is surrounded by more than 28 C atoms inside the 10Å radius sphere. Hence hydrophobic amino acids dominate the distribution and acidic and basic amino acids are rare.

We show examples of the second order term on the right hand side of Eq.C. In Figures B and C, the calculated ratios of conditional probabilities of pairs between the same amino acid residues were shown. The ratios in Figure B are of the pairs with spatial distances within a range of 0 to 8Å. One of the three lines is for the pairs that both of the residues are not buried (blue, lighter category of environment class). The others are for the pairs that both of the residues are buried (brown, heavier category of environment class) and for the pairs in a mixed environment (green). In cases of “non buried” and “mix”, the ratios for acidic pairs and basic pairs are less than 1 excepting the histidine pair. This means that those pairs do not prefer to be in a small area. We did not include the ratios of the cysteine pair in the figure. The ratio of the cysteine pair in “non buried” case was 14.2 which is one order larger than those of the other pairs. This high ratio reflects the strong correlation resulting from disulfide bridge between two cysteines.

| Figure B: The ratios of the pairs of amino acid residues with spatial distances within a range 0 to 8Å were shown. |
| --- |

The ratios in Figure C are of the pairs with spatial distances within a range of 15 to 16Å. Because of long distance between residue pair, significant correlation is unlikely and hence, the ratios are around 1.

As we explained in the previous paragraphs, the expansion formula of the conditional probability of sequence (Eq.A) is an exact equation and corresponds to a decomposition of the structural condition into a series of term representing *m*-body interaction where *m* runs from 1 to the total number of sequence residues. We decided to use an approximated equation (Eq.C) instead of Eq.A, because it is unlikely that the higher order terms contribute significantly. The first order and second order terms represent the amino acid preference of the structural environment like residue burial and the pairwise interaction between amino acid residues, respectively. It has been found that those terms describe well the known features of interaction between amino acid pair and of local environment of amino acid residue in protein.

| Figure C: The ratios of the pairs of amino acid residues with spatial distances within a range 15 to 16Å were shown. |
| --- |

**A normal distribution assumption of :** We assumed that is a normal distribution and estimated the means and variances based on the twenty models of the V3-loop structure (PDB code: 1CE4). Here we check its validity by use Shapiro-Wilk test. We showed the obtained p-values for the four parameters in the following table.

|  | a | b | c | d |
| --- | --- | --- | --- | --- |
| p-value | 0.204 | 0.547 | 0.493 | 0.197 |

For all of the four parameters the null hypothesis that the parameters obey a normal distribution can not be rejected (p>0.05).

**A correlation between structural entropy and averaged RMSD:** We showed the correlation coefficients and p-value of the regression analysis for the eight patients in the following table.

| Patient index | Correlation coefficient | p-value |
| --- | --- | --- |
| p1 | 0.945 | 5×10-20 |
| p2 | 0.987 | 1×10-36 |
| p3 | 0.984 | 2×10-23 |
| p5 | 0.992 | 4×10-23 |
| p6 | 0.952 | 1×10-10 |
| p7 | 0.995 | 6×10-63 |
| p9 | 0.966 | 5×10-25 |
| p11 | 0.883 | 2×10-7 |

The p-values for all of the eight patients are much smaller than 0.01.
